# Supplementary material for: MPAC: a computational framework for inferring cancer pathway activities from multi-omic data
Source: PubMed Central journal article supplement (PMC11212914; doi:10.1101/2024.06.15.599113), 2024-06-17
Supplement: NIHPP2024.06.15.599113v1-supplement-1.pdf [file NIHPP2024.06.15.599113v1-supplement-1.pdf]

### **Supplementary figure legends**

**Supplementary Figure 1. HPV- exploratory set patient samples grouped by GO term enrichment based on IPL (A), CNA (B), or RNA (C).** The selection threshold was lowered to  $\geq 3$  (B) or  $\geq 60\%$  (C) to include more GO terms to avoid bias.

**Supplementary Figure 2. HPV+ exploratory set patient samples grouped by GO term enrichment based on CNA (A) or RNA (B).** The selection threshold was lowered to  $\geq 2$  (A) or  $\geq 60\%$  (B) to include more GO terms to avoid bias.

**Supplementary Figure 3. HPV+ exploratory set patient samples grouped by MPAC's input RNA states. (A)** Clustering results by K-means under a pre-specified total number of groups ranging from two to six; **(B)** Clustering results by K-means with a pre-specified six groups; **(C–G)** Top significantly enriched GO terms in group I (C), II (D), III (E), IV (F), and V (G). The selection threshold was lowered to  $\geq 95\%$  (F),  $\geq 70\%$  (G), or  $\geq 50\%$  (C–E) in order to include more GO terms to avoid bias.

**Supplementary Figure 4. HPV+ exploratory set patient samples grouped by MPAC's input**

**CNA states. (A)** Clustering results by K-means under a pre-specified total number of groups

ranging from two to six; **(B)** Clustering results by K-means with a pre-specified six groups.

Group III, IV, V, and VI contained one sample each.

**Supplementary Figure 5. CNA, RNA, and pathway states of CD28 (A), CD86 (B), and LCP2**

**(C), as well as pathway states of their pathway network neighbors in the eleven group I**

**patients.**

**Supplementary Figure 6. CNA, RNA, and pathway states of TYK2 (A) and IL12RB1 (B), as**

**well as pathway states of their pathway network neighbors in the eleven group I patients.**

**Supplementary Figure 7. CNA, RNA, and pathway states of CD247 (A) and FASLG (B), as**

**well as pathway states of their pathway network neighbors in the eleven group I patients.**

**Supplementary Figure 8. CNA, RNA, and pathway states of FASLG as well as pathway**

**states of its pathway network neighbors in a group I patient TCGA-CR-7385.**

**Supplementary Figure 9. Overall survival of HPV+ exploratory set patient samples**

**stratified by the inferred pathway levels (IPLs) of proteins from the same submodule (A)**

**or individual protein (B). Not all overall survival tests were statistically significant under a  $P <$**

**0.01 cutoff.**

**Supplementary Figure 10. Progression-free survival of HPV+ exploratory set patient samples stratified by the inferred pathway levels (IPLs) of all the seven proteins combined (A); proteins from the same submodule (B), or individual protein (C).** Not all progression-free survival tests were statistically significant under a  $P < 0.01$  cutoff.

**Supplementary Figure 11. Immune cell compositions stratified by the inferred pathway levels (IPLs) of all the seven proteins combined for HPV+ exploratory (A) and validation (B) set.** Adjusted Wilcoxon test P on the cell composition difference between two groups of patient samples were shown for each cell type. Eosinophil was not found in either the exploratory or validation sets. T cell CD4+ naïve was not found in the validation set.

**Supplementary Figure 12. Overall survival of HPV+ validation set patient samples stratified by the inferred pathway levels (IPLs) of proteins from the same submodule (A) or individual protein (B).** Not all overall survival tests were statistically significant under a  $P < 0.01$  cutoff.

A

322 patient samples in HPV- exploratory set by IPL

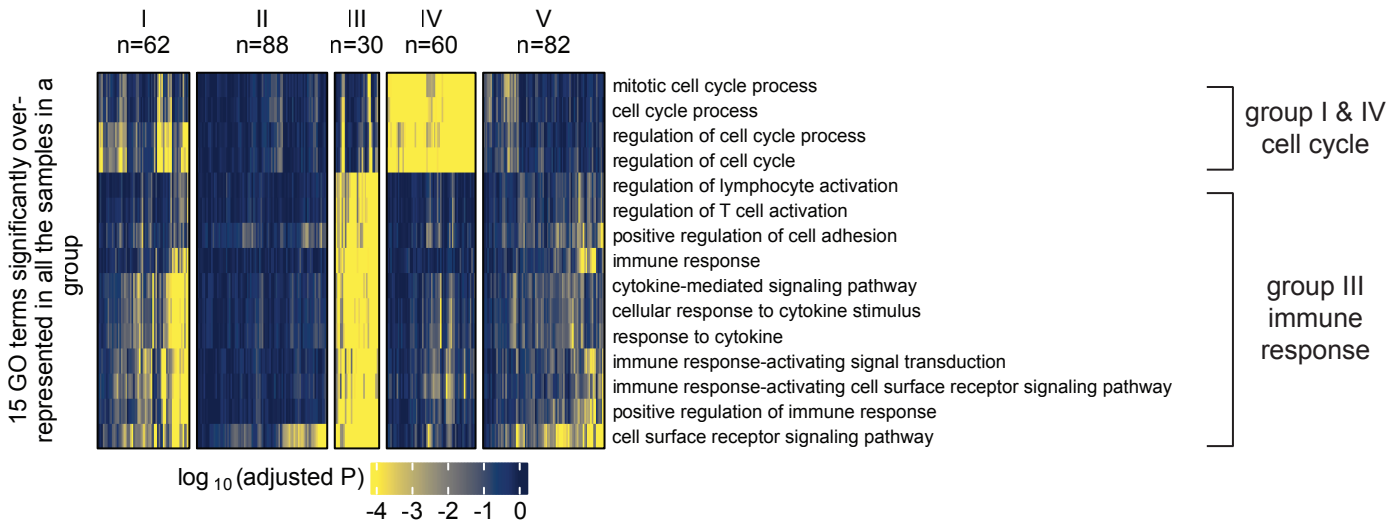

B

322 patient samples in HPV- exploratory set by CNA

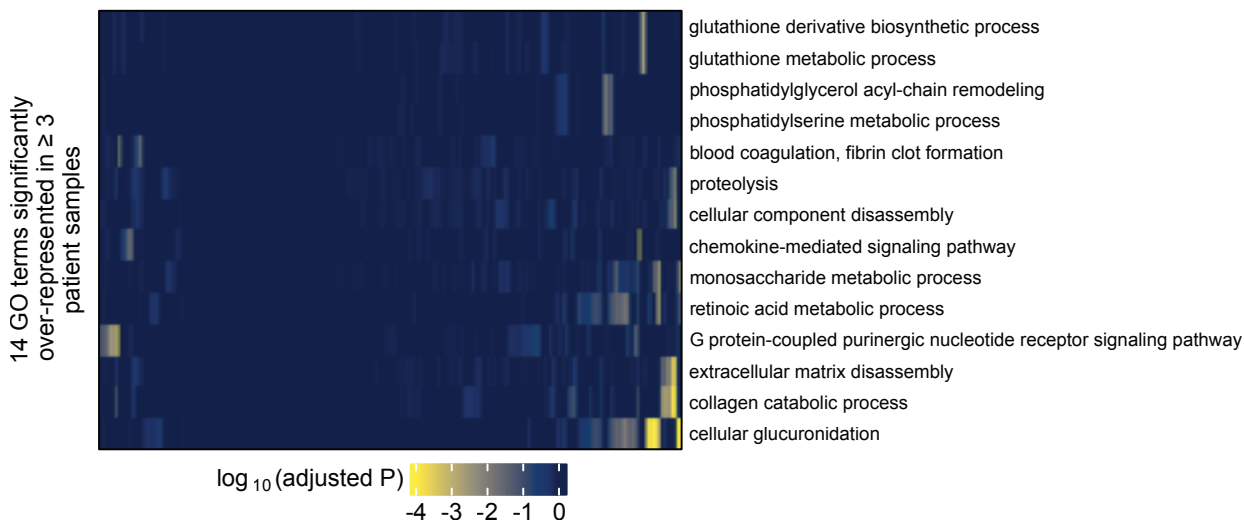

C

322 patient samples in HPV- exploratory set by RNA

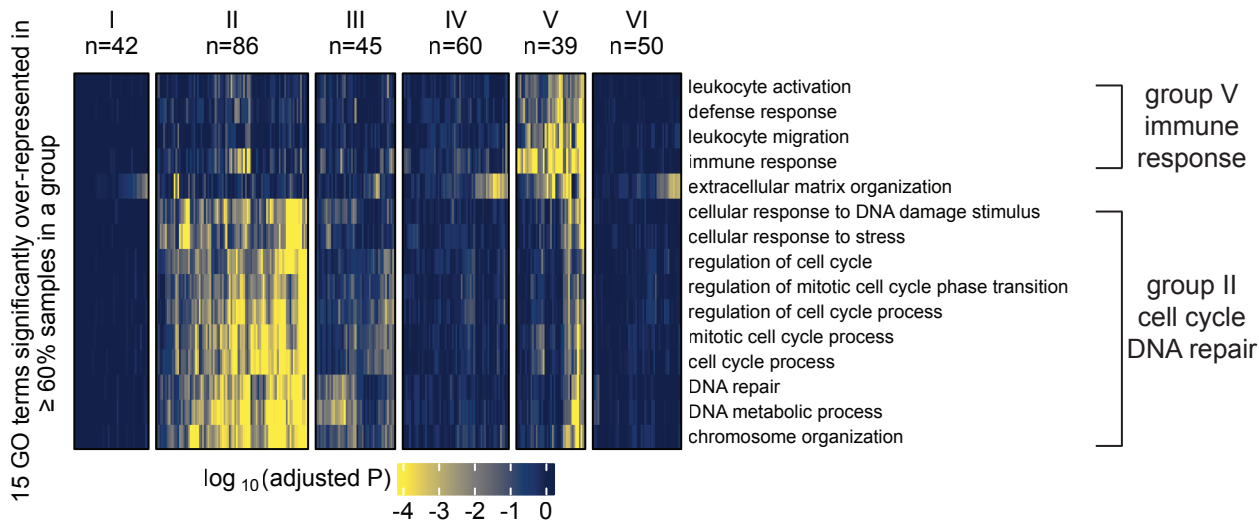

**A**

71 patient samples in HPV+ exploratory set by CNA

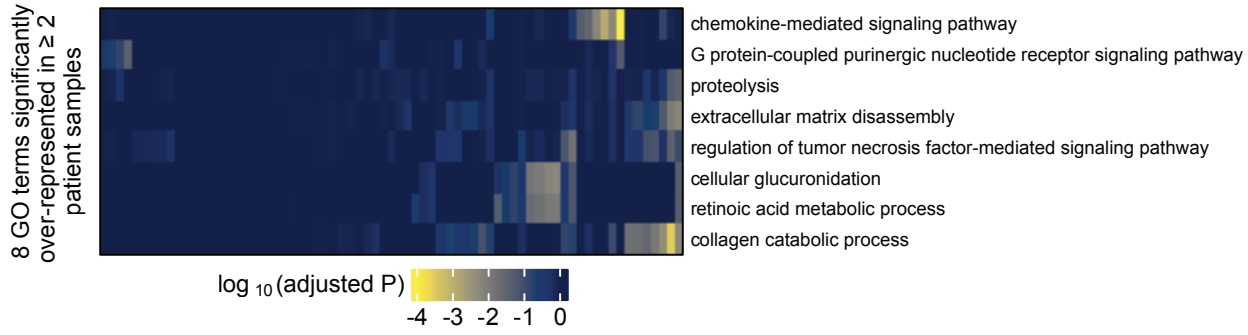

**B**

71 patient samples in HPV+ exploratory set by RNA

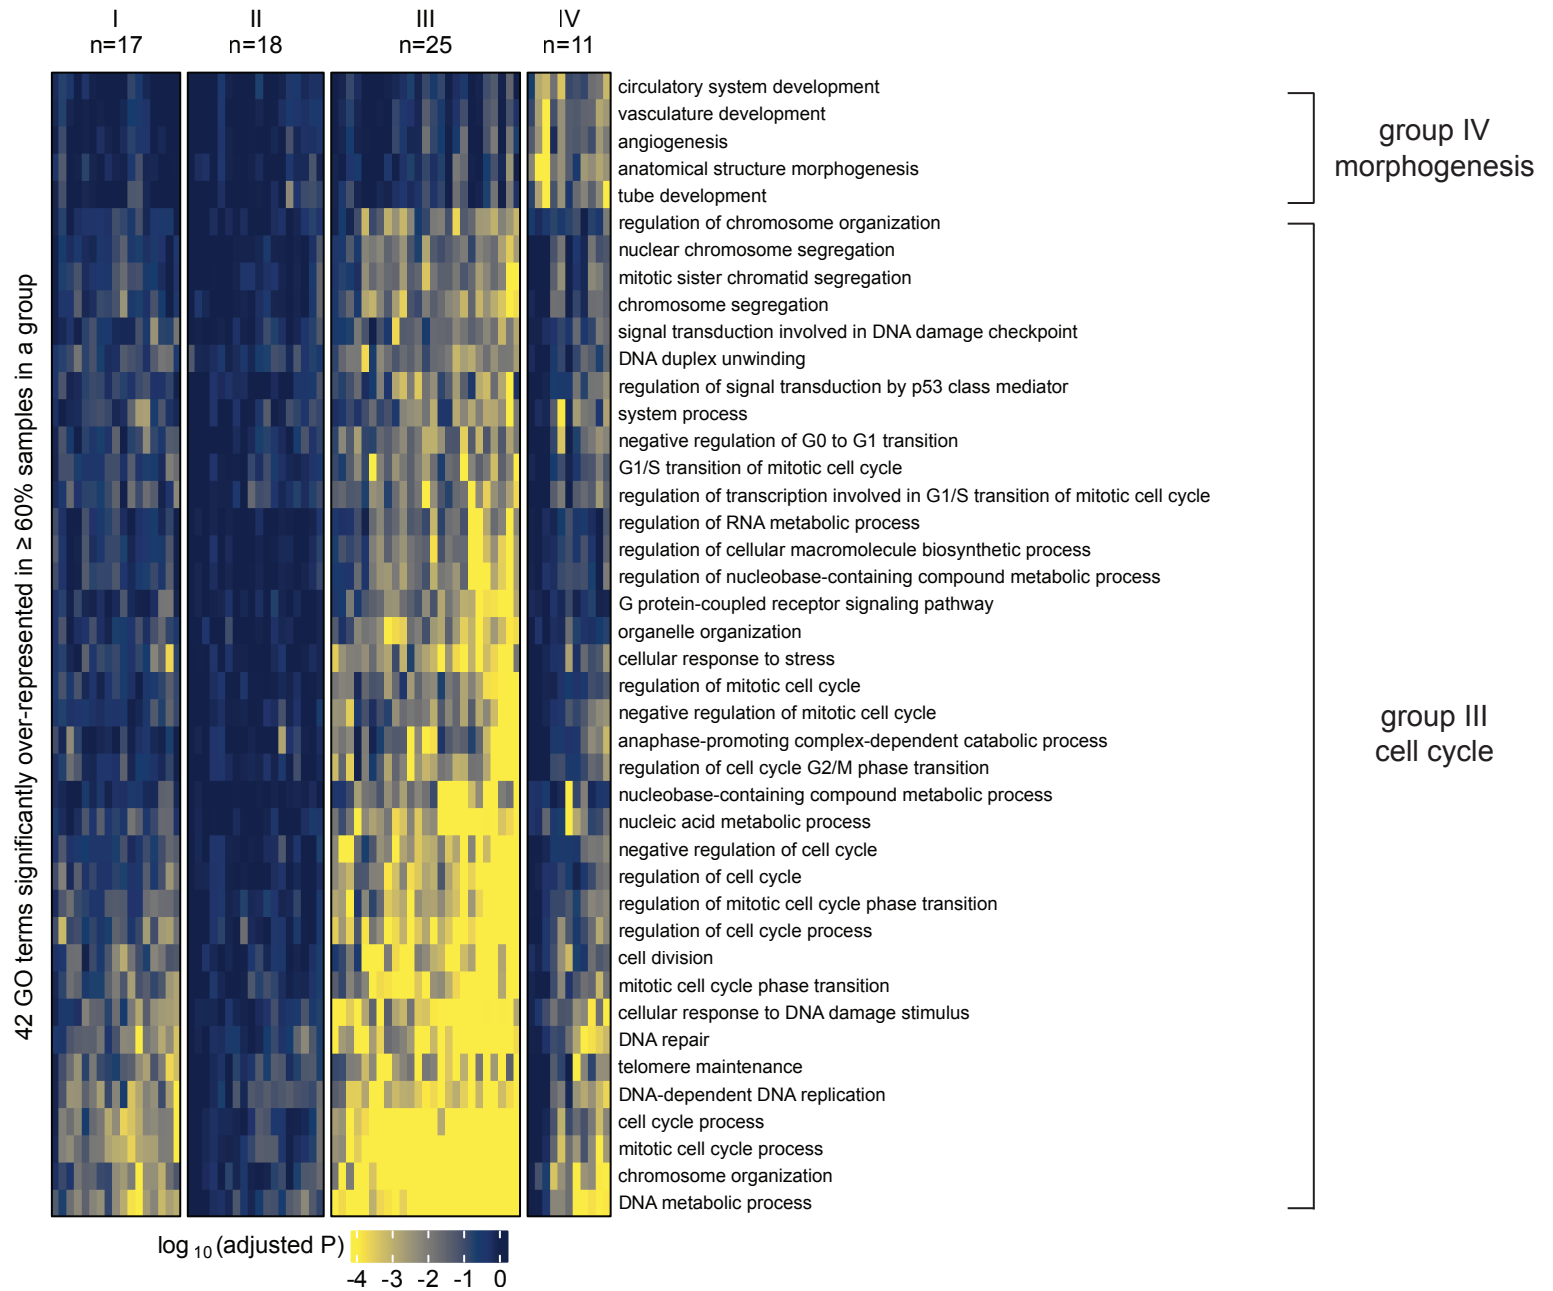

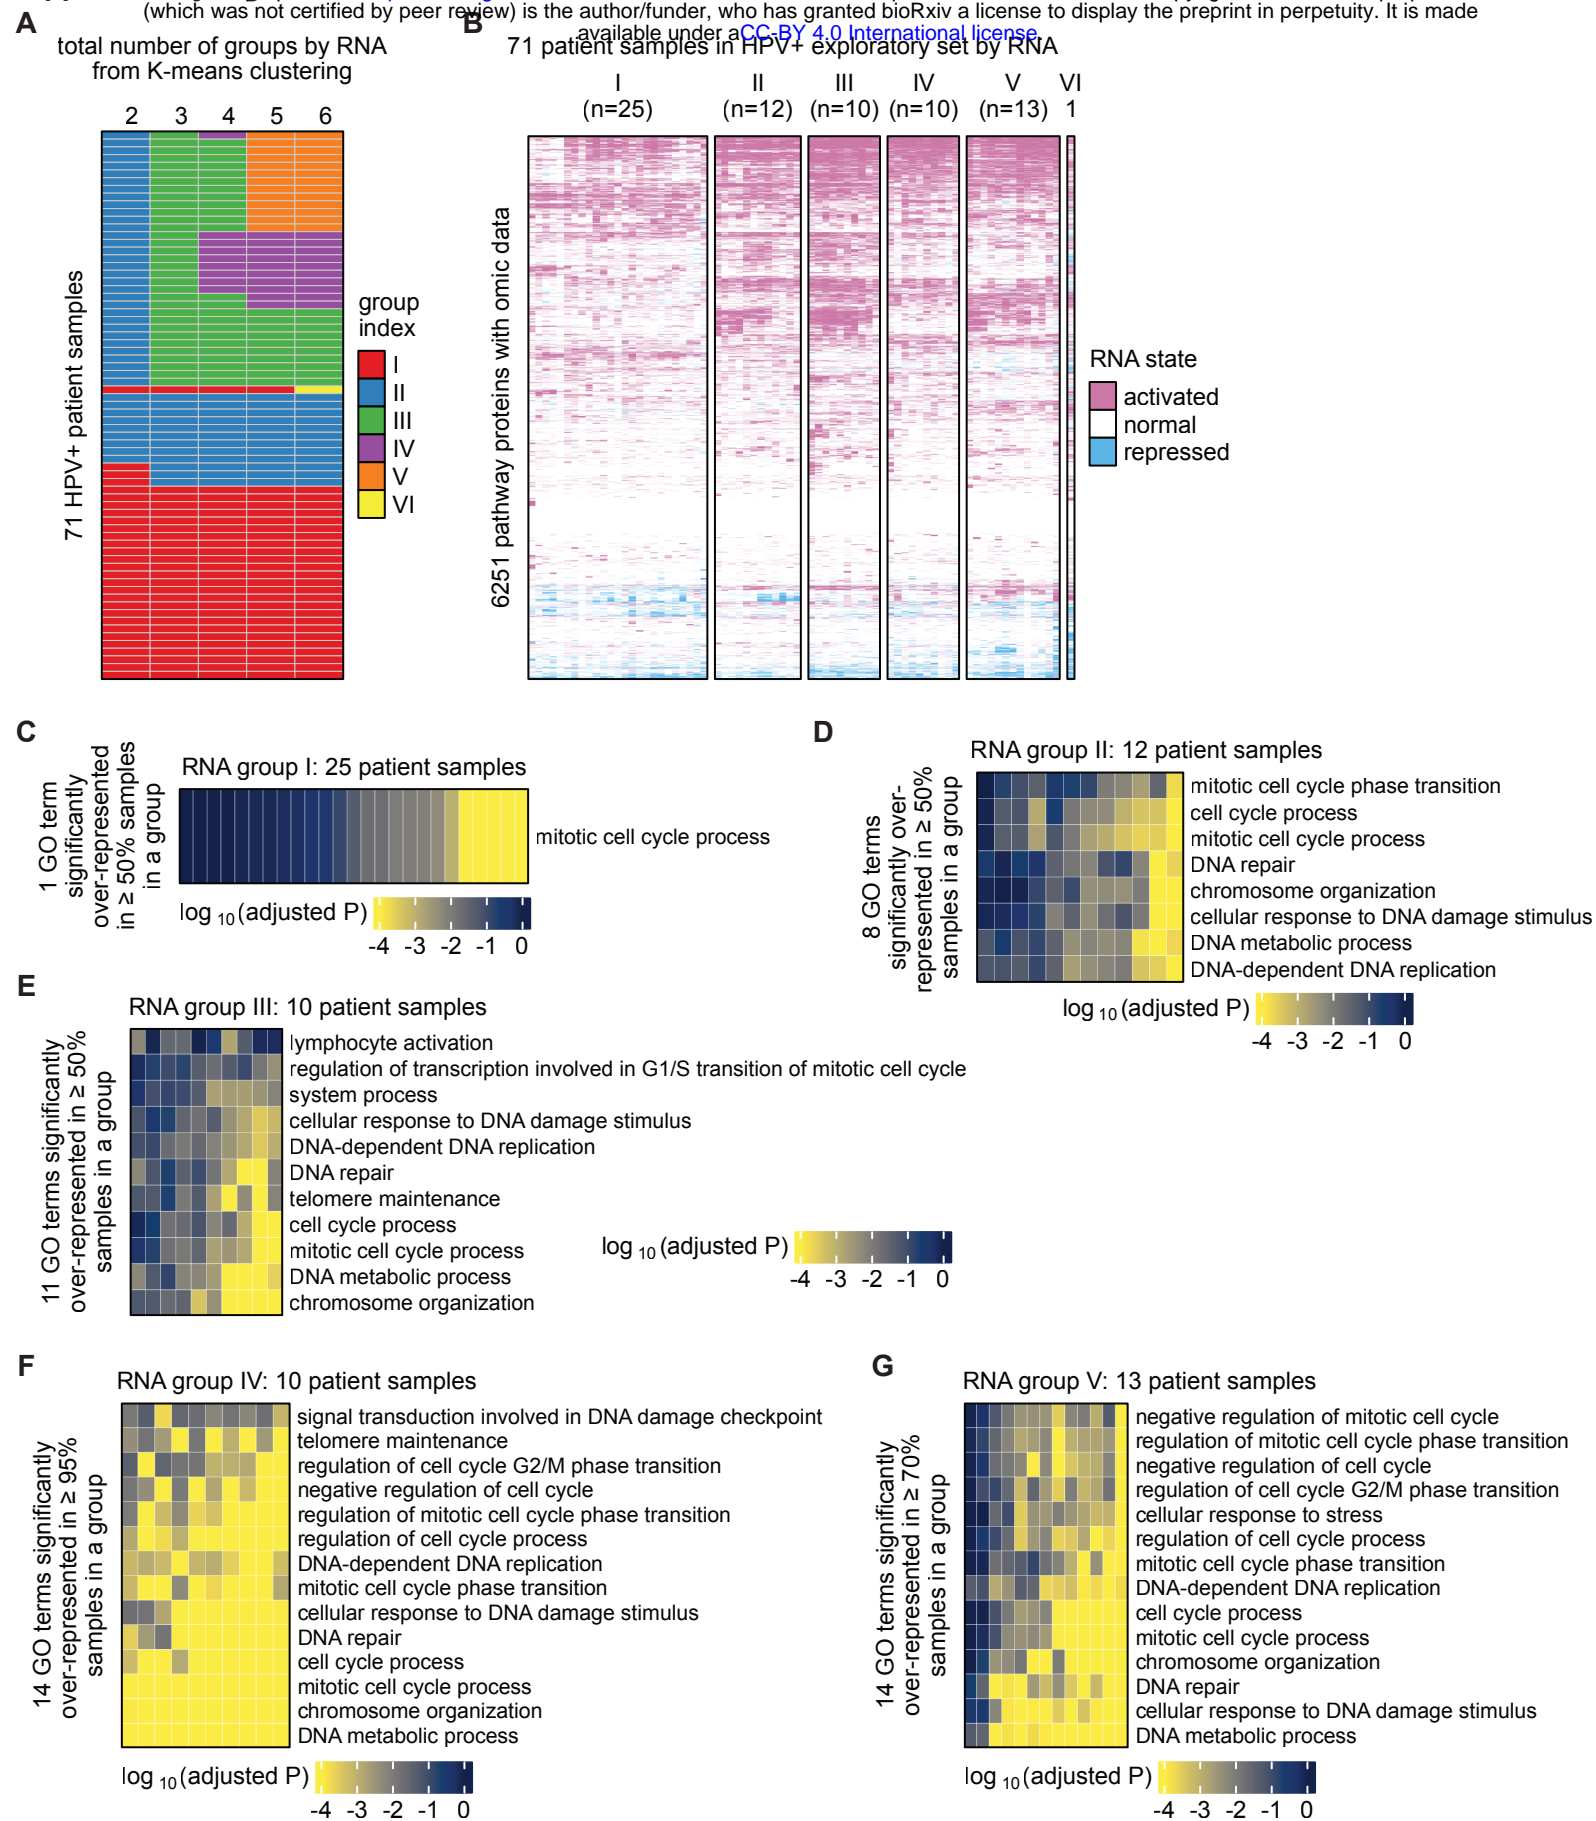

**A**

total number of groups by CNA  
from K-means clustering

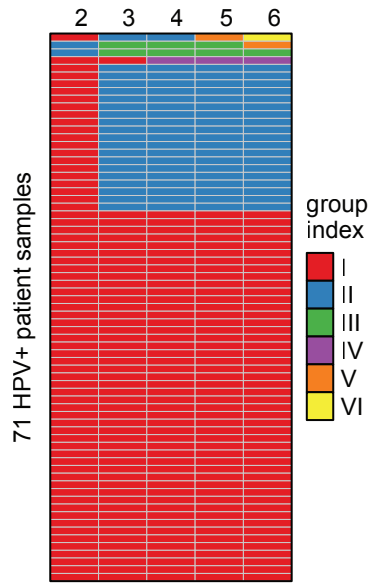

**B**

71 patient samples in HPV+ exploratory set by CNA

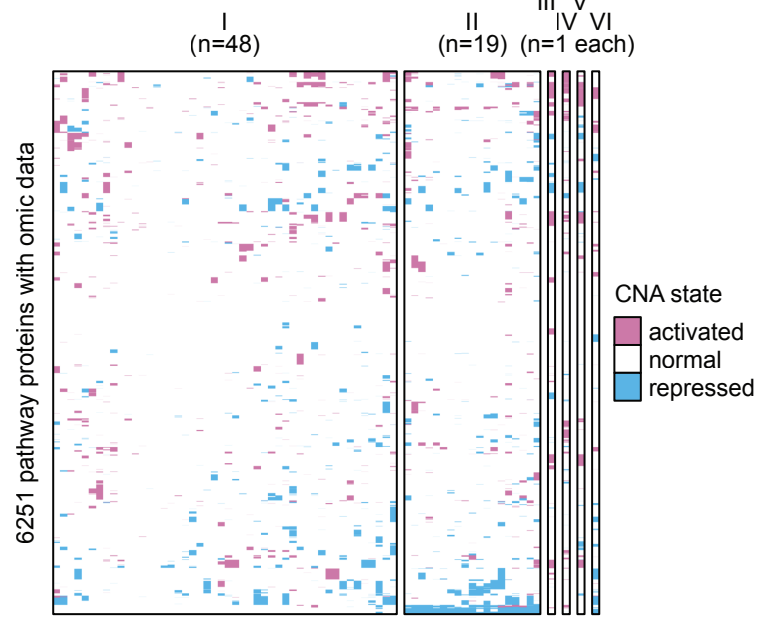

**A**

11 group I patient samples in HPV+ exploratory set

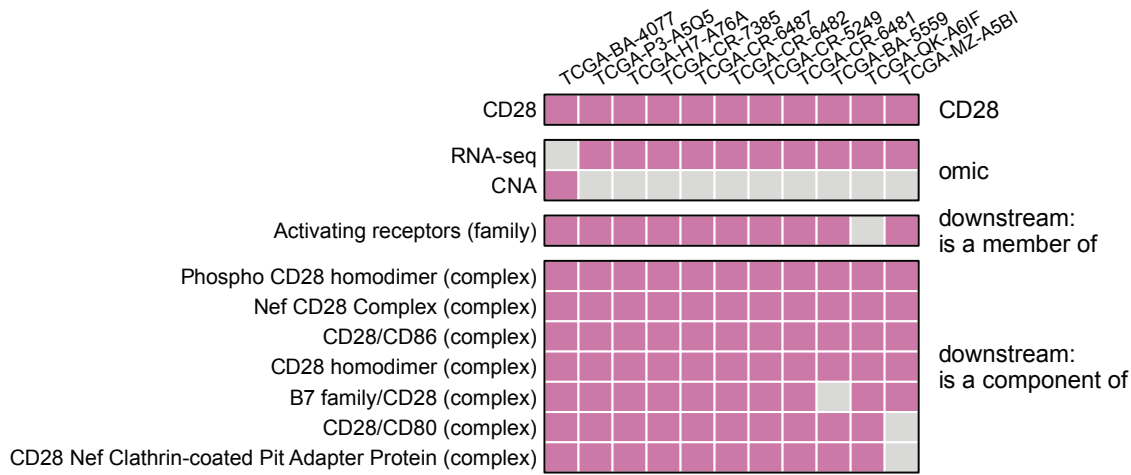

**B**

11 group I patient samples in HPV+ exploratory set

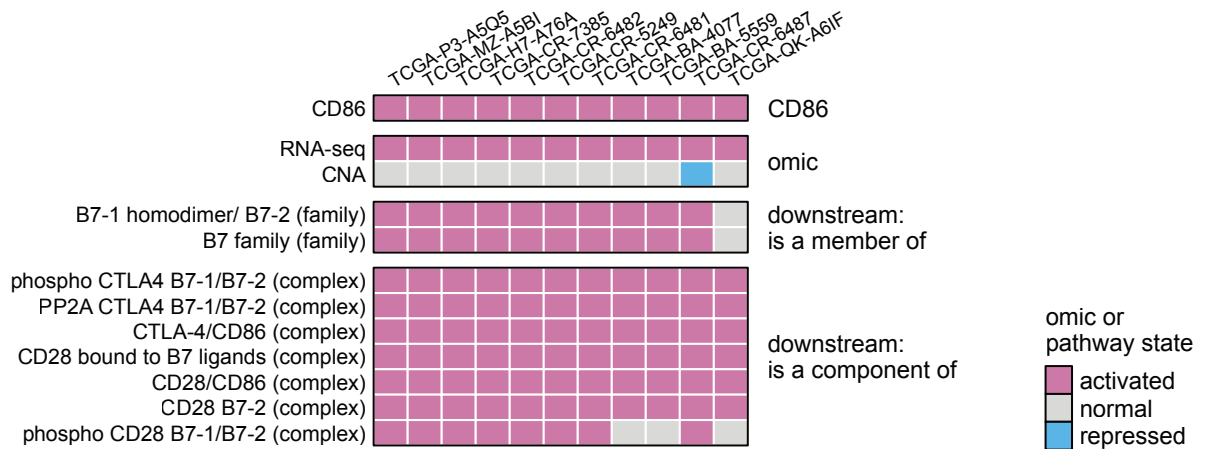

**C**

11 group I patient samples in HPV+ exploratory set

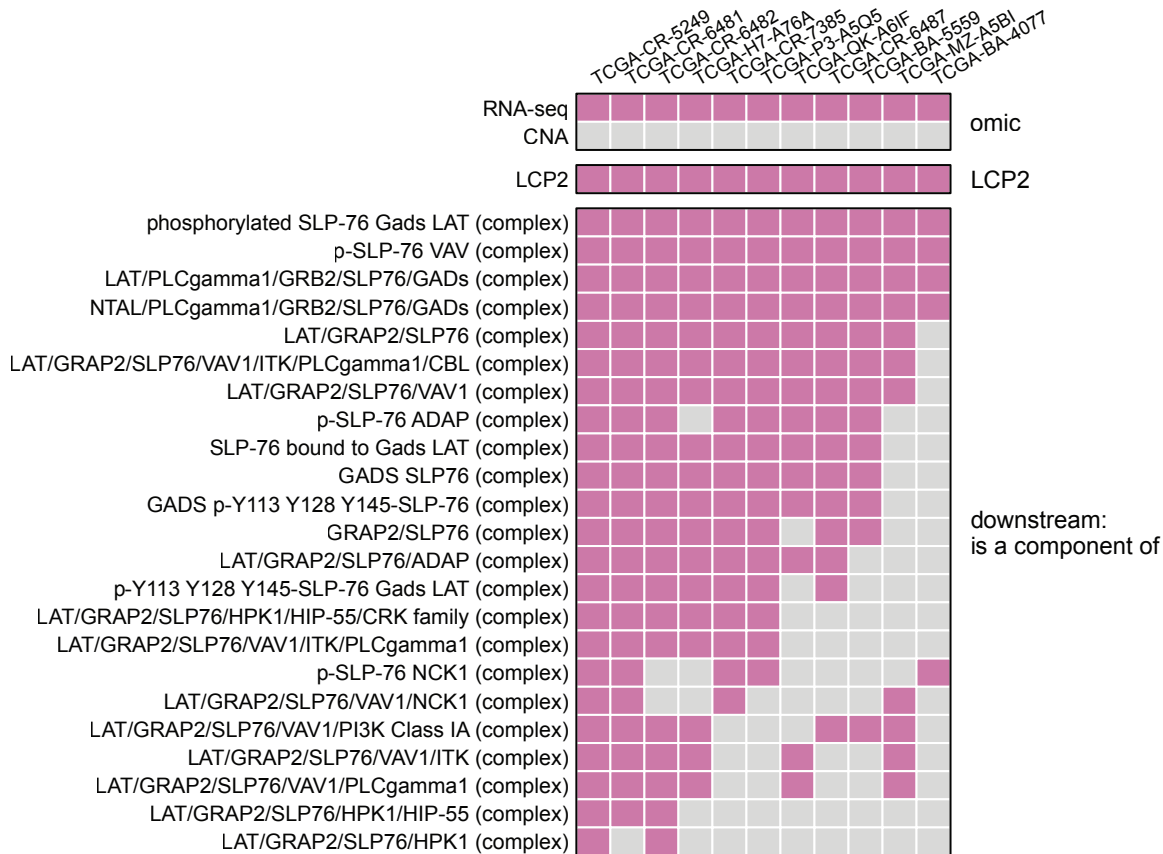



**A**

11 group I patient samples in HPV+ exploratory set

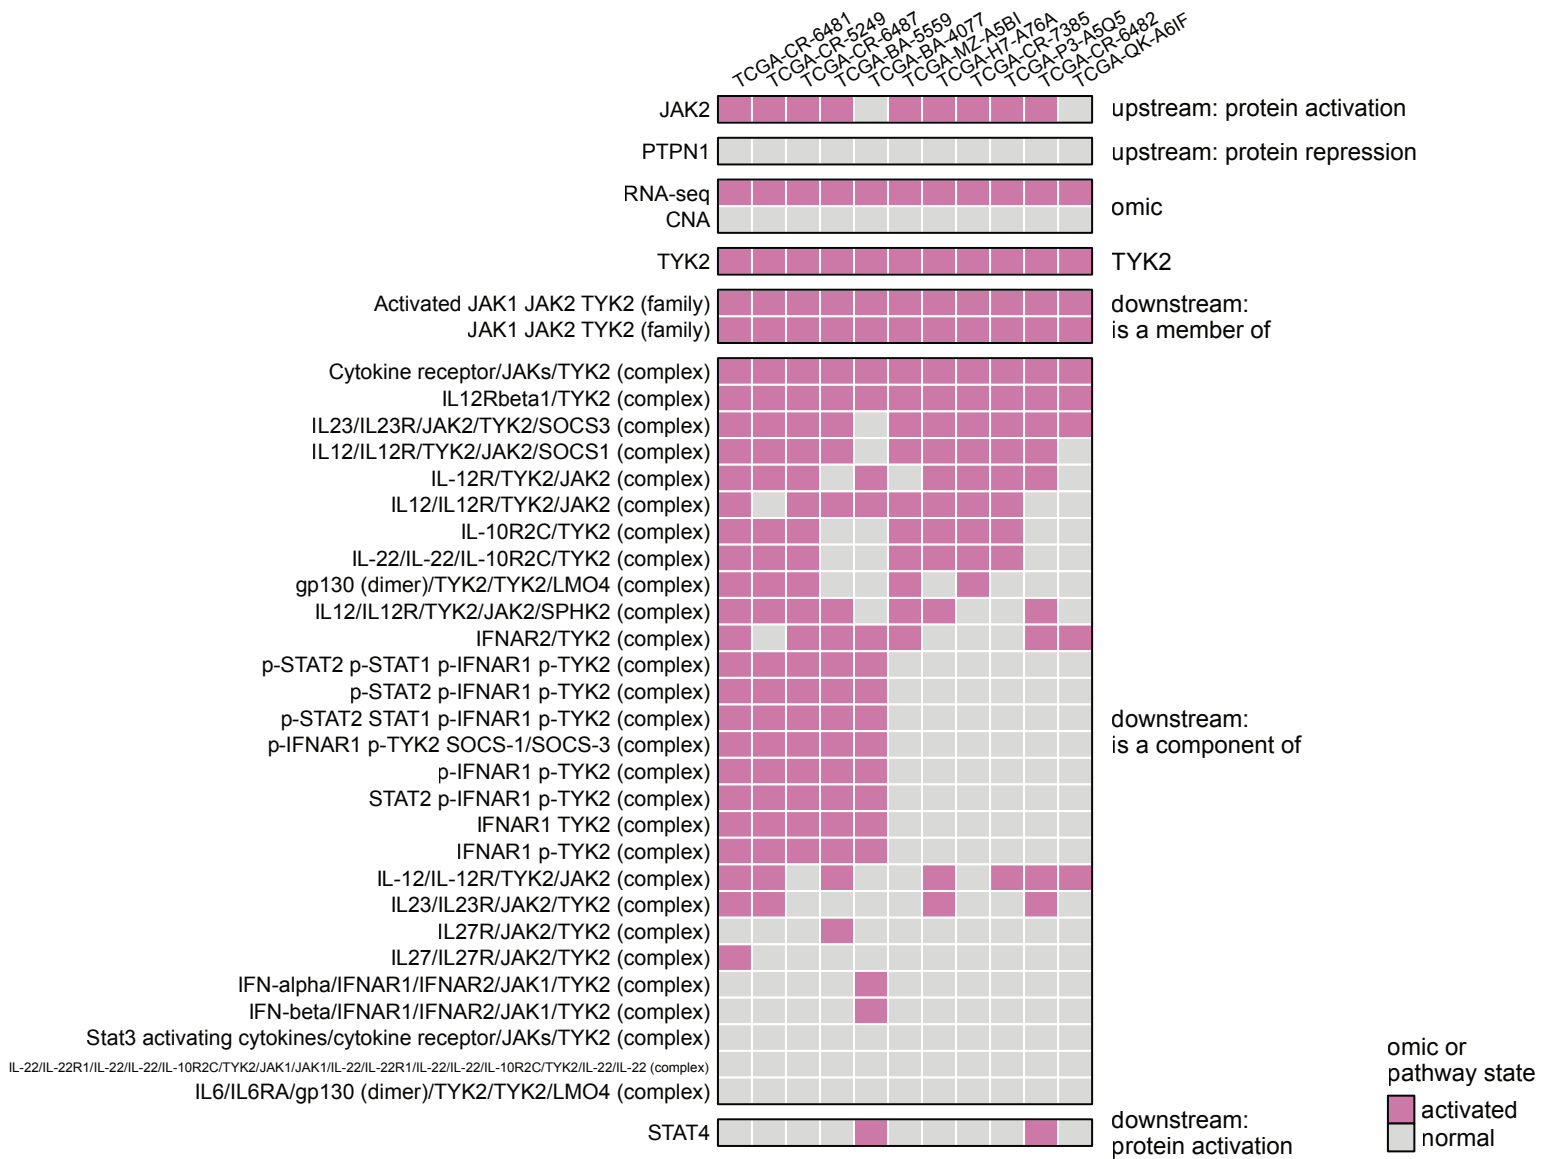

**B**

11 group I patient samples in HPV+ exploratory set

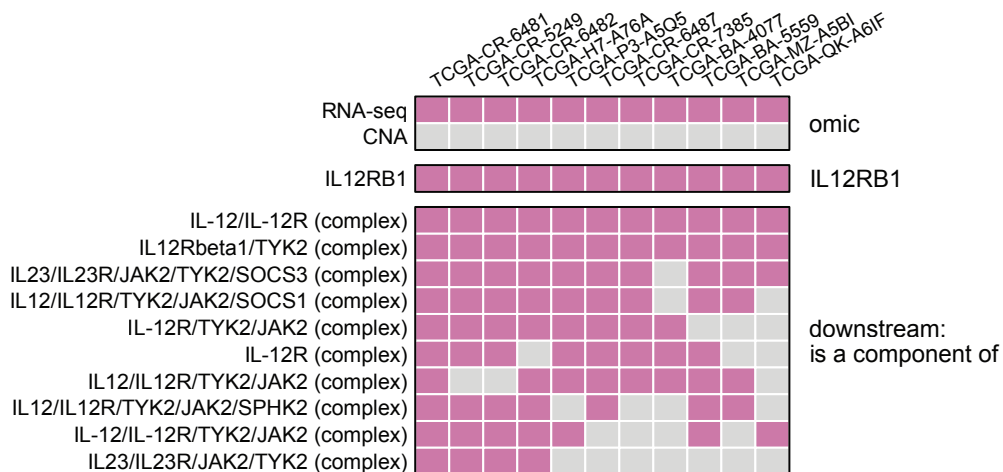

**A**

11 group I patient samples in HPV+ exploratory set

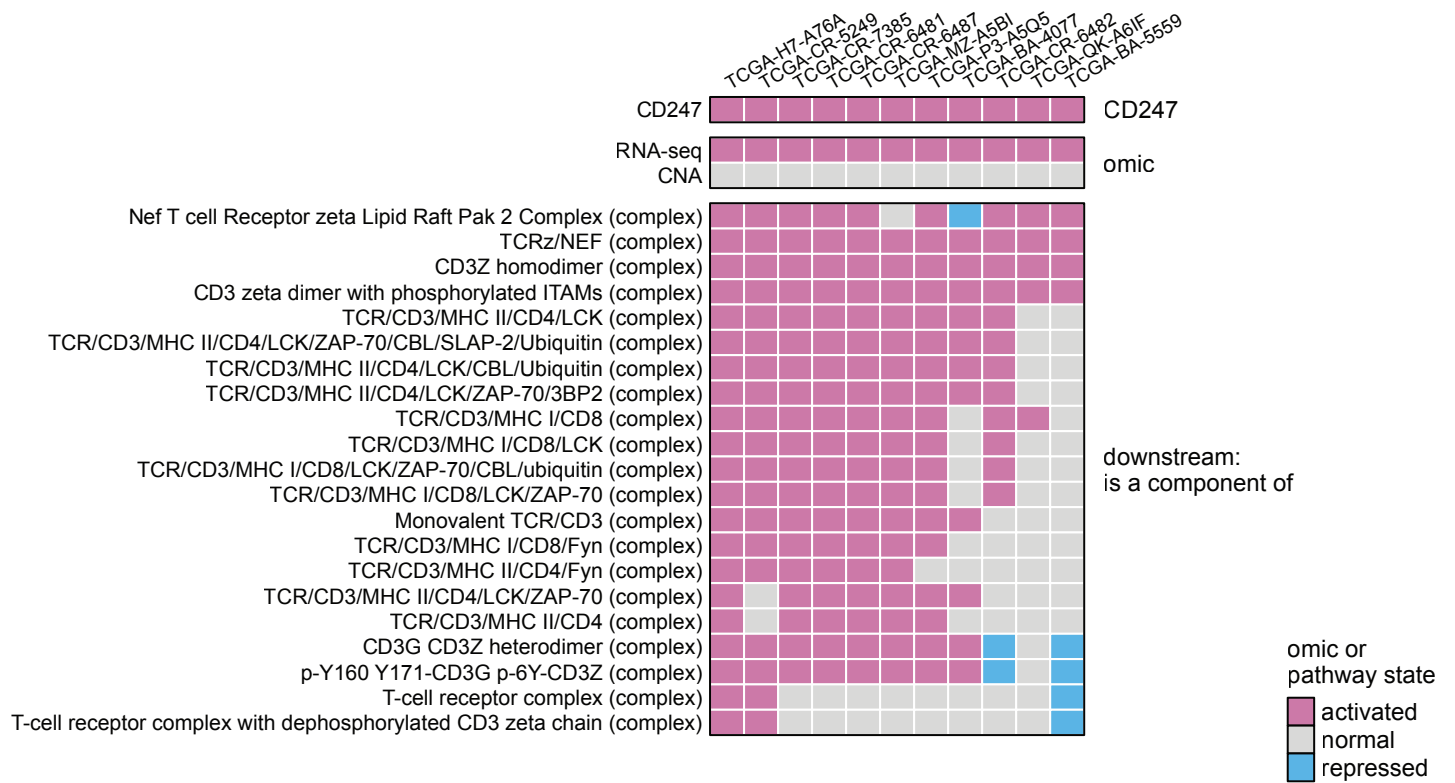

**B**

11 group I patient samples in HPV+ exploratory set

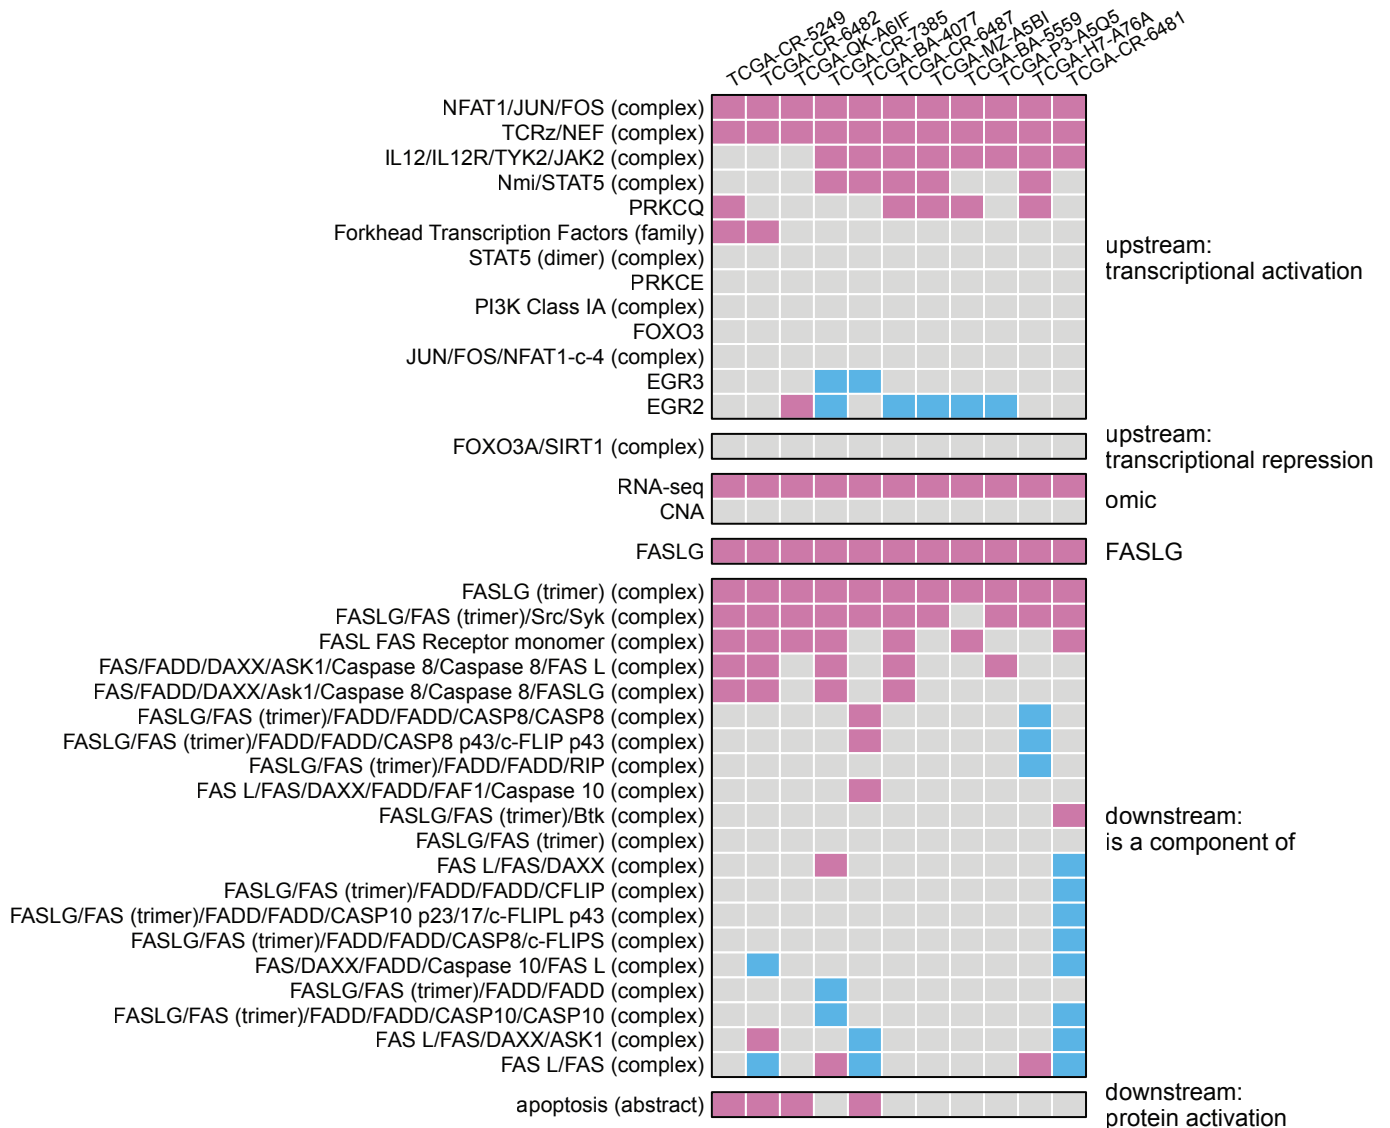

TCGA-CR-7385

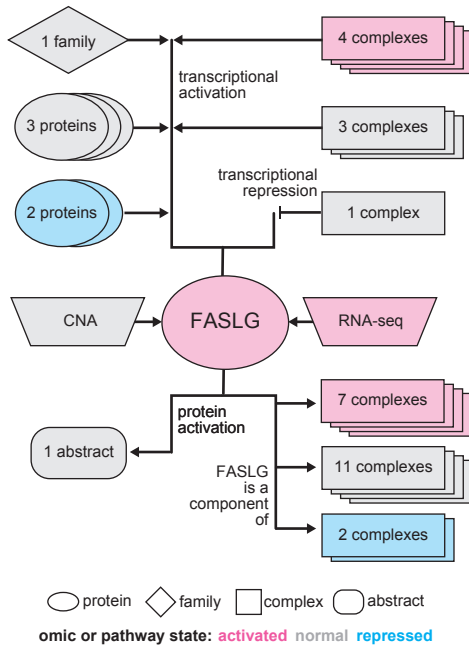

A

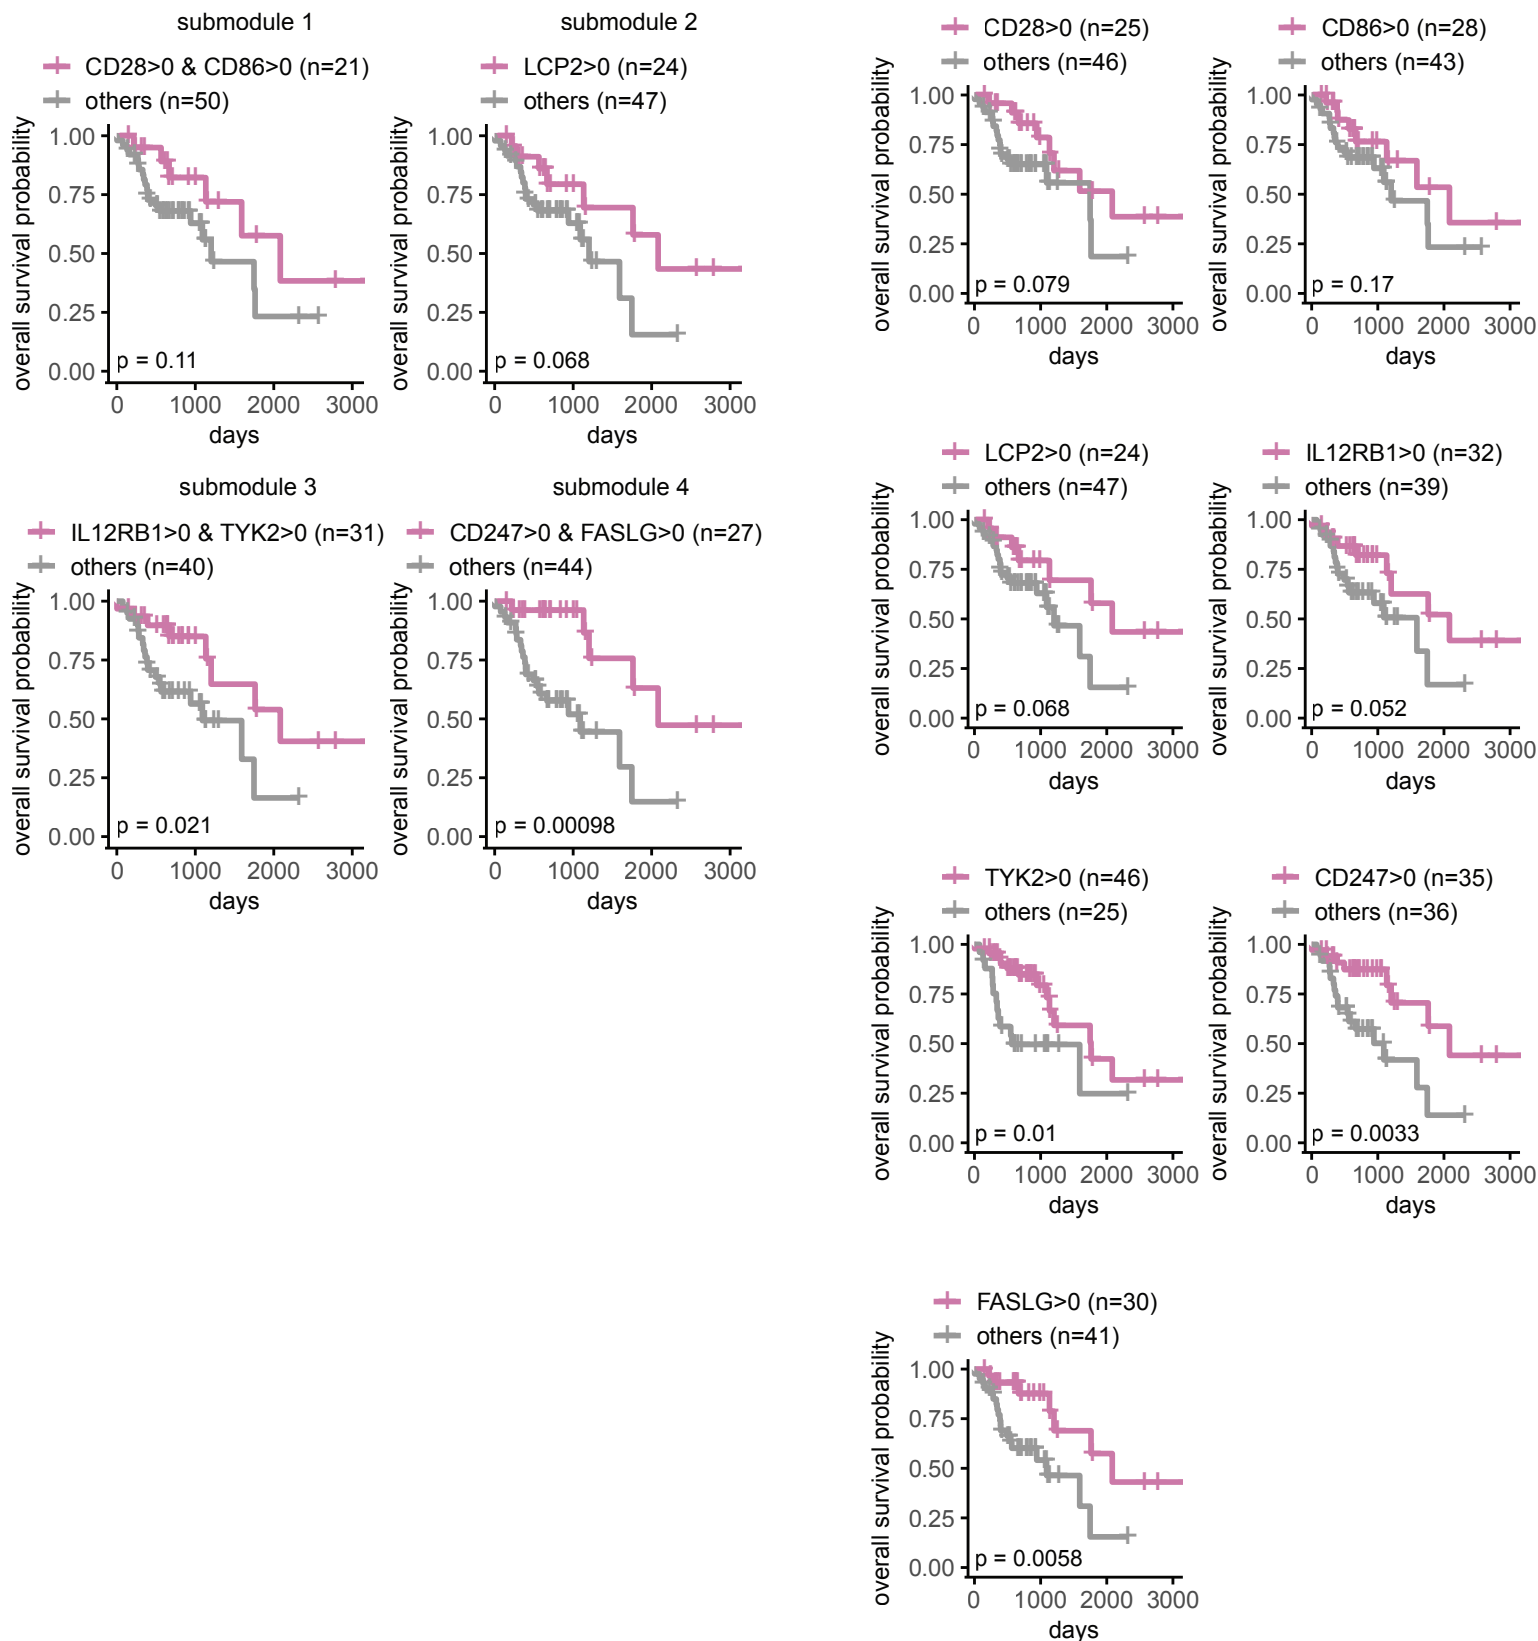

**A**

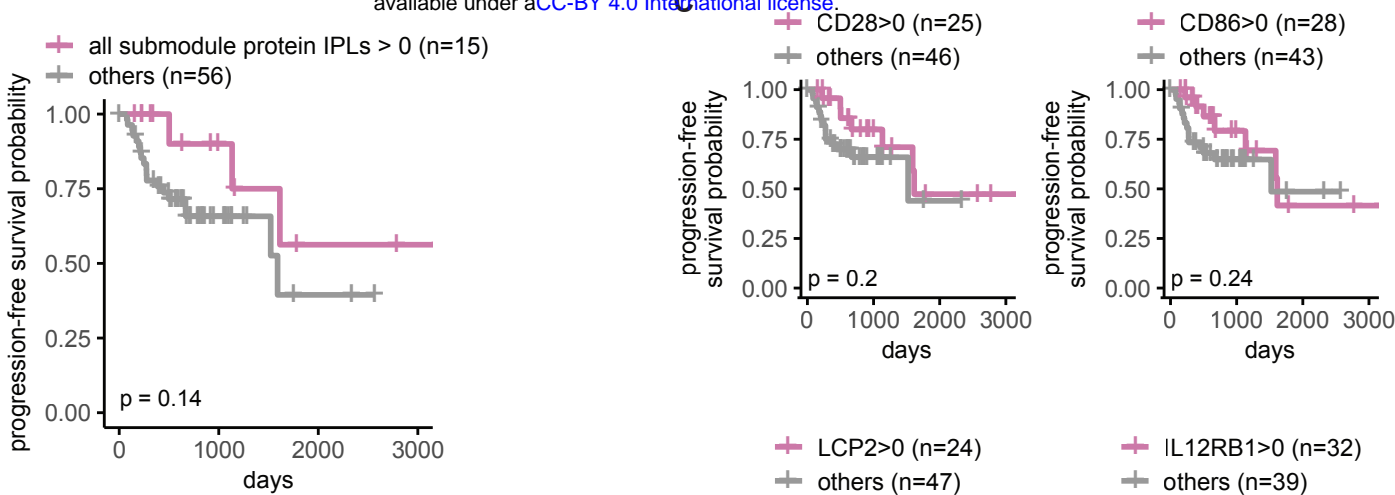

**B**

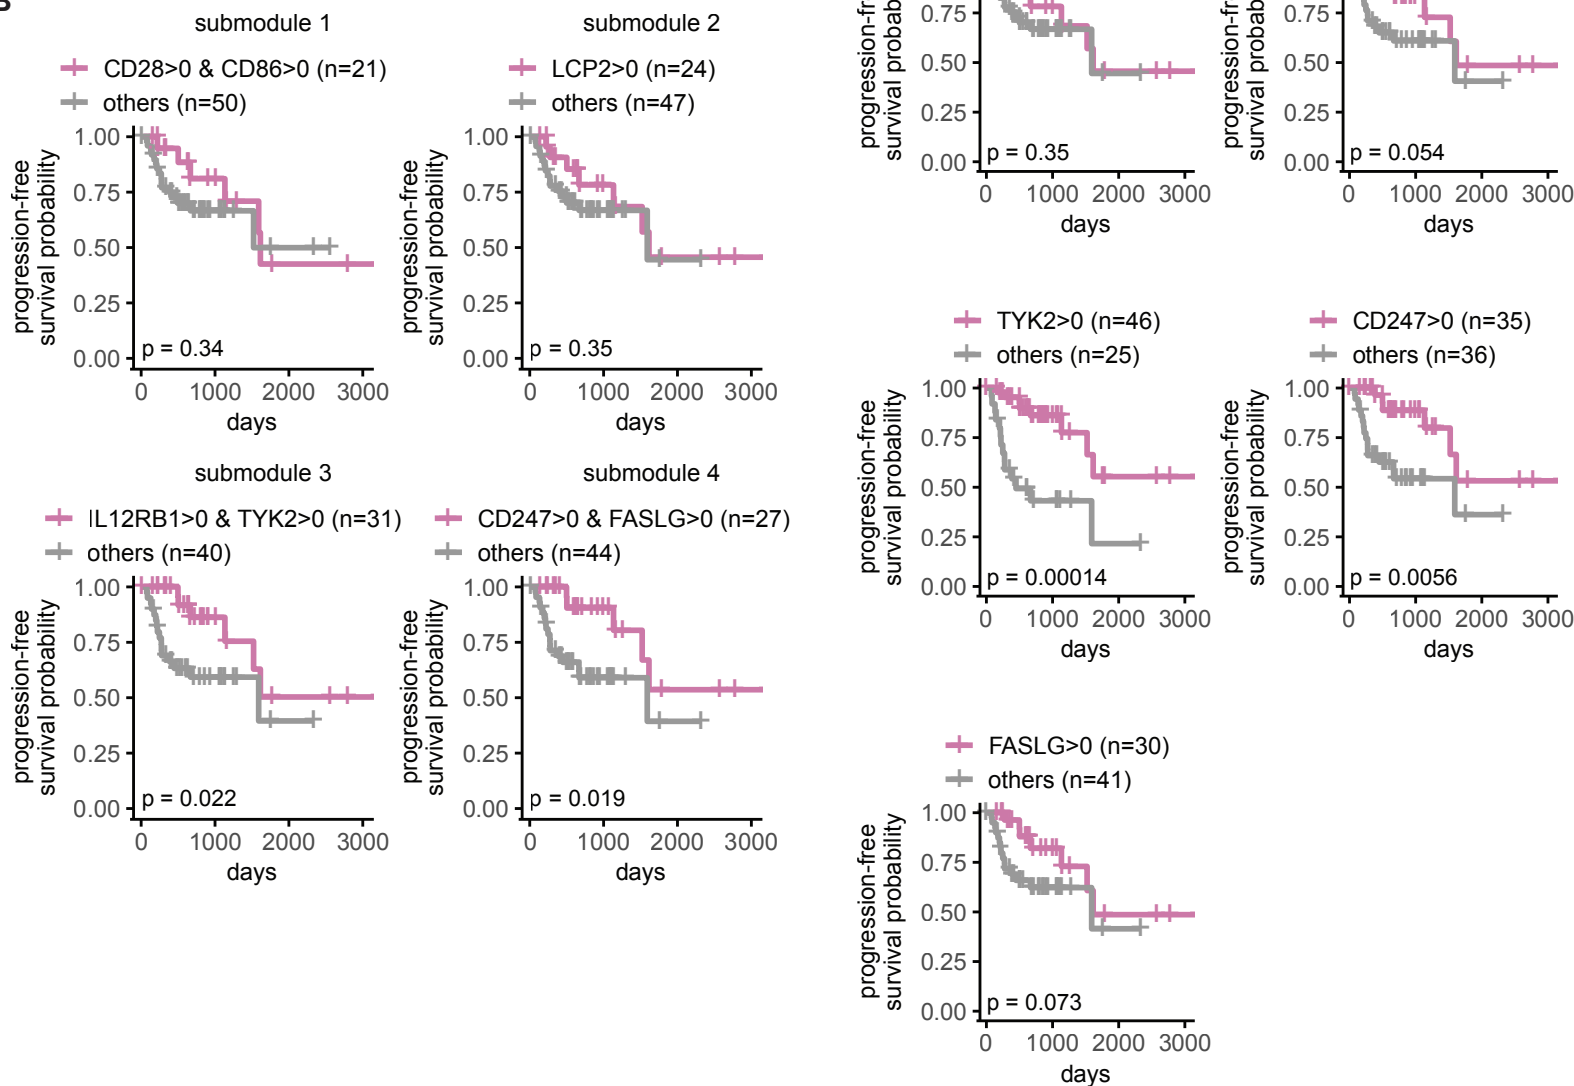

# Supplementary Figure 11

bioRxiv preprint doi: <https://doi.org/10.1101/2024.06.15.599113>; this version posted June 17, 2024. The copyright holder for this preprint (which was not certified by peer review) is the author/funder, who has granted bioRxiv a license to display the preprint in perpetuity. It is made available under aCC-BY 4.0 International license.

**A**

71 patient samples in HPV+ exploratory set

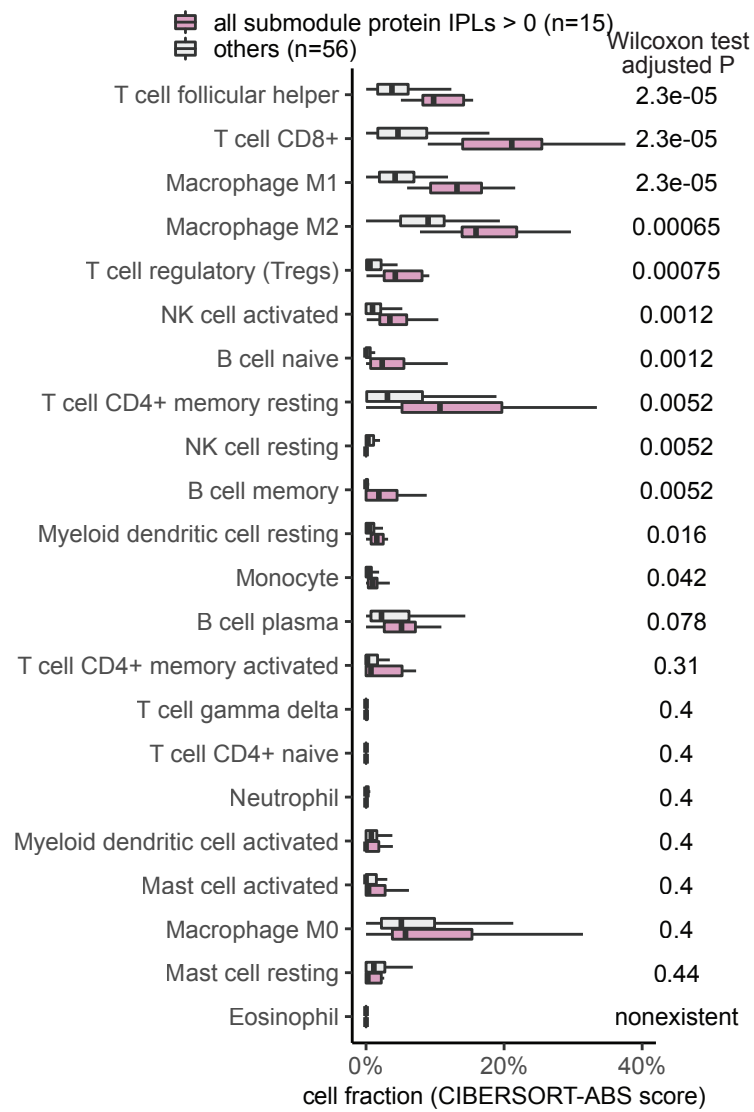

**B**

18 patient samples in HPV+ validation set

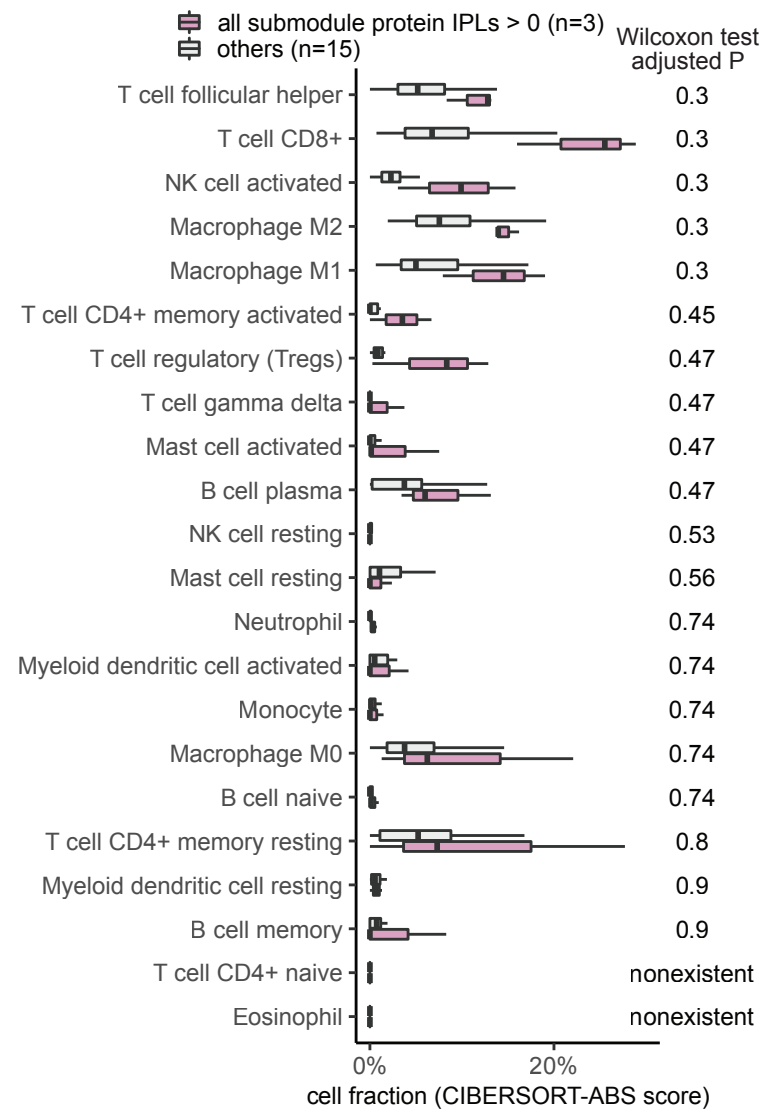

A

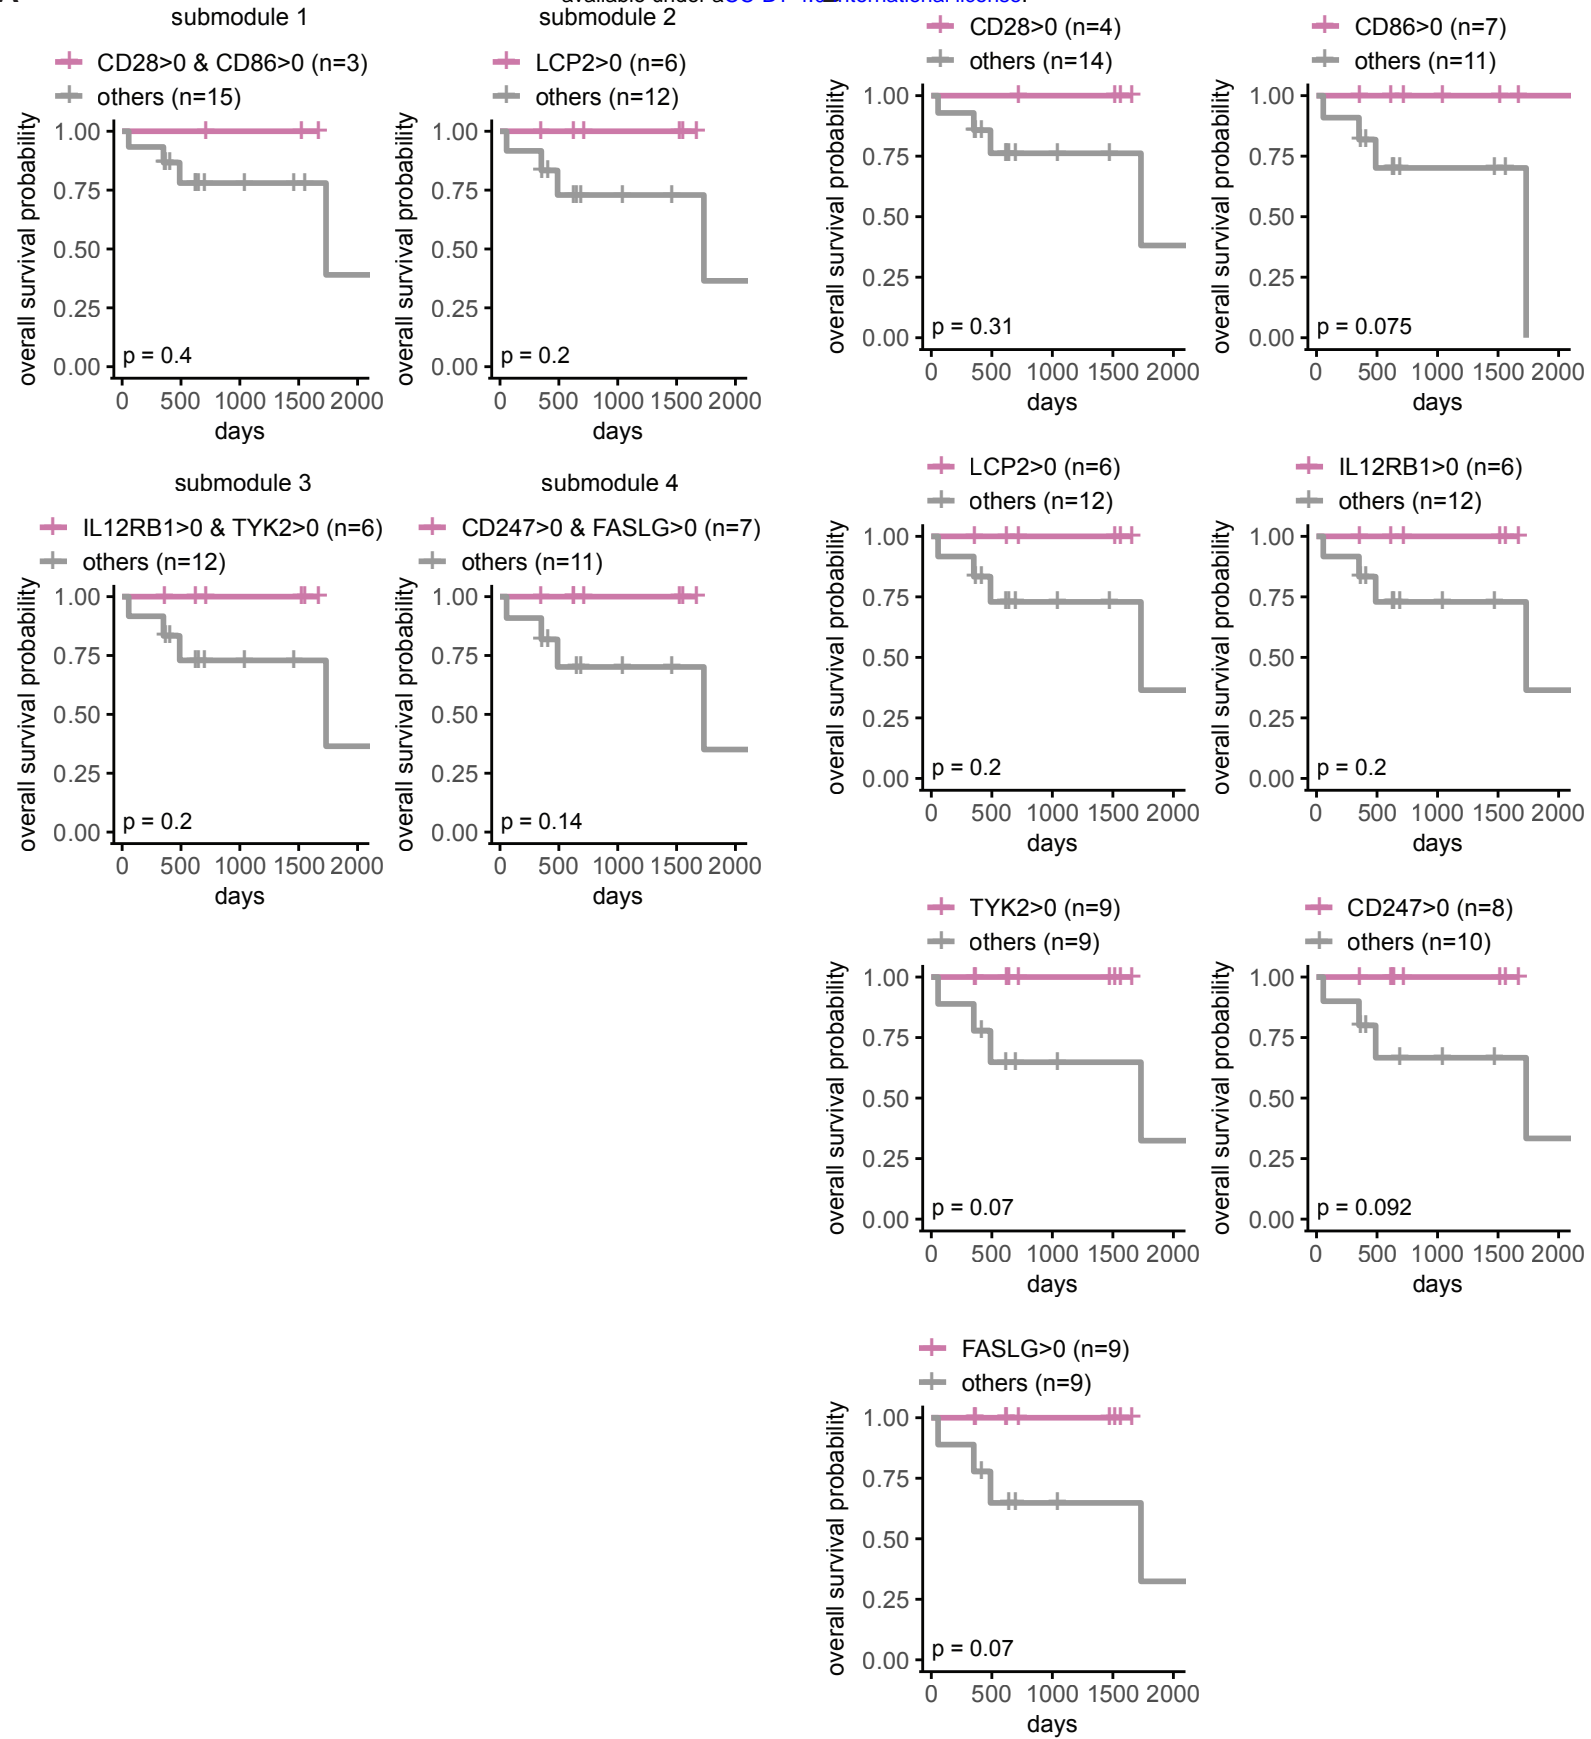

B
